# Supplementary material
Source: publisher figshare collection journal article supplement (https://rs.figshare.com/ndownloader/files/12544583)
Supplement: Supplementary file 1 [file 12544583]

## Supplementary material part 2

**Information use during movement regulates how fragmentation and loss of habitat affect body size**

**Jasmijn Hillaert, Martijn L. Vandegehuchte, Thomas Hovestadt, Dries Bonte**

**Proceedings of the Royal Society B**

**DOI: 10.1098/rspb.2018.0953**

*Table 2.1: Overview of default total runtime per simulation. P refers to the level percentage of suitable habitat within a landscape and H to the level of spatial autocorrelation. (I: scenario with informed movement, PI: scenario with partially informed movement and UI: scenario with uninformed movement)*

|    | P 0.05 H0 | P0.05 H0.5 | P0.05 H1 | P0.20 H0.5 | P0.20 H1 | P0.50 H1 | P0.90 H1 |
|----|-----------|------------|----------|------------|----------|----------|----------|
| I  | 11000     | 11000      | 11000    | 11000      | 11000    | 4900     | 2400     |
| PI | 20000     | 20000      | 20000    | 20000      | 20000    | 13000    | 13000    |
| UI | 20000     | 20000      | 20000    | 20000      | 20000    | 19000    | 19000    |

*Table 2.2: Overview of total runtime per simulation when testing effect higher carrying capacity of the resource ( $K=3000$ ). P refers to the level percentage of suitable habitat within a landscape and H to the level of spatial autocorrelation. (I: scenario with informed movement, PI: scenario with partially informed movement and UI: scenario with uninformed movement)*

|    | P 0.05 H0 | P0.05 H0.5 | P0.05 H1 | P0.20 H0.5 | P0.20 H1 | P0.50 H1 | P0.90 H1 |
|----|-----------|------------|----------|------------|----------|----------|----------|
| I  | 10000     | 10000      | 10000    | 8000       | 8000     | 3000     | 2000     |
| PI | 20000     | 20000      | 20000    | 20000      | 20000    | 10000    | 10000    |
| UI | 20000     | 20000      | 20000    | 20000      | 20000    | 15000    | 15000    |

*Table 2.3: Overview of total runtime per simulation when testing effect higher growth speed of the resource ( $r=0.9$ ). P refers to the level percentage of suitable habitat within a landscape and H to the level of spatial autocorrelation. (I: scenario with informed movement, PI: scenario with partially informed movement and UI: scenario with uninformed movement)*

|    | P 0.05 H0 | P0.05 H0.5 | P0.05 H1 | P0.20 H0.5 | P0.20 H1 | P0.50 H1 | P0.90 H1 |
|----|-----------|------------|----------|------------|----------|----------|----------|
| I  | 10000     | 10000      | 10000    | 7000       | 7000     | 2500     | 1500     |
| PI | 20000     | 20000      | 20000    | 20000      | 20000    | 10000    | 9000     |
| UI | 20000     | 20000      | 20000    | 20000      | 20000    | 15000    | 15000    |

*Table 2.4: Overview of total runtime per simulation when testing effect higher maximum movement time per day ( $t_m$  maximally 2 hours per day). P refers to the level percentage of suitable habitat within a landscape and H to the level of spatial autocorrelation. (I: scenario with informed movement, PI: scenario with partially informed movement and UI: scenario with uninformed movement)*

|    | P 0.05 H0 | P0.05 H0.5 | P0.05 H1 | P0.20 H0.5 | P0.20 H1 | P0.50 H1 | P0.90 H1 |
|----|-----------|------------|----------|------------|----------|----------|----------|
| I  | 11000     | 11000      | 11000    | 10000      | 10000    | 4000     | 2400     |
| PI | 20000     | 20000      | 20000    | 20000      | 20000    | 13000    | 12000    |
| UI | 20000     | 20000      | 20000    | 20000      | 20000    | 18000    | 14000    |

Table 2.5: Overview of total runtime per simulation when testing effect higher maximum consumption time per day ( $t_f$  maximally 20 hours per day).  $P$  refers to the level percentage of suitable habitat within a landscape and  $H$  to the level of spatial autocorrelation. (I: scenario with informed movement, PI: scenario with partially informed movement and UI: scenario with uninformed movement)

|    | P 0.05 H0 | P0.05 H0.5 | P0.05 H1 | P0.20 H0.5 | P0.20 H1 | P0.50 H1 | P0.90 H1 |
|----|-----------|------------|----------|------------|----------|----------|----------|
| I  | 11000     | 11000      | 11000    | 11000      | 11000    | 4900     | 2400     |
| PI | 20000     | 20000      | 20000    | 20000      | 20000    | 13000    | 13000    |
| UI | 20000     | 20000      | 20000    | 20000      | 20000    | 19000    | 15000    |

Table 2.6: Overview of total runtime per simulation when testing effect higher number of eggs per clutch ( $N=50$ ).  $P$  refers to the level percentage of suitable habitat within a landscape and  $H$  to the level of spatial autocorrelation. (I: scenario with informed movement, PI: scenario with partially informed movement and UI: scenario with uninformed movement)

|    | P 0.05 H0 | P0.05 H0.5 | P0.05 H1 | P0.20 H0.5 | P0.20 H1 | P0.50 H1 | P0.90 H1 |
|----|-----------|------------|----------|------------|----------|----------|----------|
| I  | 11000     | 11000      | 11000    | 9000       | 9000     | 3000     | 2000     |
| PI | 20000     | 20000      | 20000    | 20000      | 20000    | 13000    | 13000    |
| UI | 20000     | 20000      | 20000    | 20000      | 20000    | 19000    | 19000    |

Table 2.7: Overview of total runtime per simulation when immigration from outside the landscape is turned off ( $q=0$ ).  $P$  refers to the level percentage of suitable habitat within a landscape and  $H$  to the level of spatial autocorrelation. (I: scenario with informed movement, PI: scenario with partially informed movement and UI: scenario with uninformed movement)

|    | P 0.05 H0 | P0.05 H0.5 | P0.05 H1 | P0.20 H0.5 | P0.20 H1 | P0.50 H1 | P0.90 H1 |
|----|-----------|------------|----------|------------|----------|----------|----------|
| I  | 11000     | 11000      | 11000    | 11000      | 11000    | 4900     | 2400     |
| PI | 20000     | 20000      | 20000    | 20000      | 20000    | 20000    | 13000    |
| UI | 20000     | 20000      | 20000    | 20000      | 20000    | 20000    | 19000    |

Table 2.8: Overview of total runtime per simulation when immigration from outside the landscape occurs every ten days.  $P$  refers to the level percentage of suitable habitat within a landscape and  $H$  to the level of spatial autocorrelation. (I: scenario with informed movement, PI: scenario with partially informed movement and UI: scenario with uninformed movement) ( $q=0.1$ )

|    | P 0.05 H0 | P0.05 H0.5 | P0.05 H1 | P0.20 H0.5 | P0.20 H1 | P0.50 H1 | P0.90 H1 |
|----|-----------|------------|----------|------------|----------|----------|----------|
| I  | 11000     | 11000      | 11000    | 11000      | 11000    | 4900     | 2400     |
| PI | 20000     | 20000      | 20000    | 20000      | 20000    | 20000    | 20000    |
| UI | 20000     | 20000      | 20000    | 20000      | 20000    | 20000    | 20000    |

Table 2.9: Overview of total runtime per simulation when perceptual range of the smallest individuals equals 0.1m and the perceptual range of the largest individuals equals 0.5m. P refers to the level percentage of suitable habitat within a landscape and H to the level of spatial autocorrelation. (I: scenario with informed movement, PI: scenario with partially informed movement and UI: scenario with uninformed movement)

|    | P 0.05 H0 | P0.05<br>H0.5 | P0.05 H1 | P0.20<br>H0.5 | P0.20 H1 | P0.50 H1 | P0.90 H1 |
|----|-----------|---------------|----------|---------------|----------|----------|----------|
| I  | 11000     | 11000         | 11000    | 11000         | 11000    | 4000     | 2400     |
| PI | 20000     | 20000         | 20000    | 20000         | 20000    | 13000    | 13000    |
| UI | 20000     | 20000         | 20000    | 20000         | 20000    | 19000    | 19000    |
